# Supplementary material
Source: publisher figshare collection journal article supplement (https://acs.figshare.com/ndownloader/files/15314969)
Supplement: Supplementary file 1 [file 15314969]

## Supporting Information

### Potent 5-Cyano-6-Phenyl-Pyrimidin-Based Derivatives Targeting DCN1-UBE2M Interaction

Wenjuan Zhou<sup>†, ‡, #</sup>, Liying Ma<sup>†, #</sup>, Lina Ding<sup>†</sup>, Qian Guo<sup>†</sup>, Zhangxu He<sup>†</sup>, Jing Yang<sup>†</sup>, Hui  
Qiao<sup>†</sup>, Lingyu Li<sup>†</sup>, Jie Yang<sup>†</sup>, Shimin Yu<sup>†</sup>, Lili Zhao<sup>†</sup>, Shaomeng Wang<sup>†, §</sup>,  
Hong-Min Liu<sup>†, \*</sup>, Zhenhe Suo<sup>‡, \*</sup>, Wen Zhao<sup>†, \*</sup>

<sup>†</sup>State Key Laboratory of Esophageal Cancer Prevention and Treatment; Key Laboratory of Advanced Pharmaceutical Technology, Ministry of Education of China; School of Pharmaceutical Sciences, Zhengzhou University, 100 Kexue Avenue, Zhengzhou, Henan, 450001, China

<sup>‡</sup>Department of Pathology, Oslo University Hospital; Faculty of Medicine, University of Oslo, Oslo, 0379, Norway

<sup>§</sup>The Rogel Cancer Center and Departments of Internal Medicine, Pharmacology, Medicinal Chemistry and Pathology, University of Michigan Medical School, Ann Arbor, Michigan, 48109, United States

<sup>#</sup>: Both authors contribute equally to this work.

<sup>\*</sup>: These senior authors contribute equally to this work.

<sup>\*</sup>: Corresponding to:

Wen Zhao, Email: [zhaowen100@139.com](mailto:zhaowen100@139.com), [zhaowen@zzu.edu.cn](mailto:zhaowen@zzu.edu.cn); Phone, 86-15003898187

Zhenhe Suo, Email: [zhenhe.suo@medisin.uio.no](mailto:zhenhe.suo@medisin.uio.no); Phone, 47-98280093

Hongmin Liu, Email: [liuhm@zzu.edu.cn](mailto:liuhm@zzu.edu.cn); Phone, 86-371-67781739.

## Table of Contents:

|                                                                                                                                                               |           |
|---------------------------------------------------------------------------------------------------------------------------------------------------------------|-----------|
| <b>Figure S1. The purities and abundances of all the recombinant proteins. ....</b>                                                                           | <b>S2</b> |
| <b>Figure S2. Solubility of compound DC-2 in phosphate buffer.....</b>                                                                                        | <b>S2</b> |
| <b>Figure S3. The direct interaction of Biotin-AcUBE2M<sup>1-21</sup> peptides with wild type DCN1(GST-DCN1) and its mutants(P97T, F164S and Y181I). ....</b> | <b>S3</b> |
| <b>HPLC spectra of representative compounds. ....</b>                                                                                                         | <b>S3</b> |

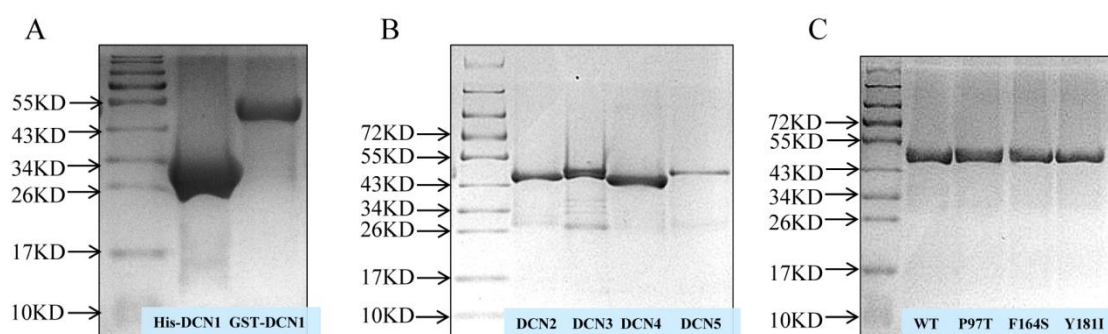

**Figure S1. The purities and abundances of all the recombinant proteins.** (A) His-tagged DCN1, GST-tagged DCN1, (B) DCN2, DCN3, DCN4, DCN5, (C) DCN1(Wild type, WT), DCN1-P97T, DCN1-F164S and DCN1-Y181I were determined by SDS-PAGE and Commassie Blue staining.

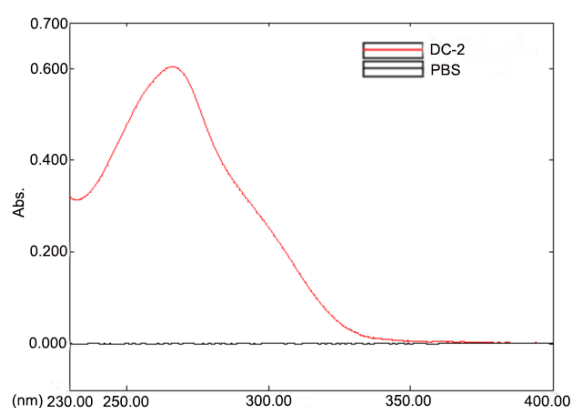

**Figure S2. Solubility of compound DC-2 in phosphate buffer.** UV-Vis absorption spectra of compound DC-2 at pH value 7.4.

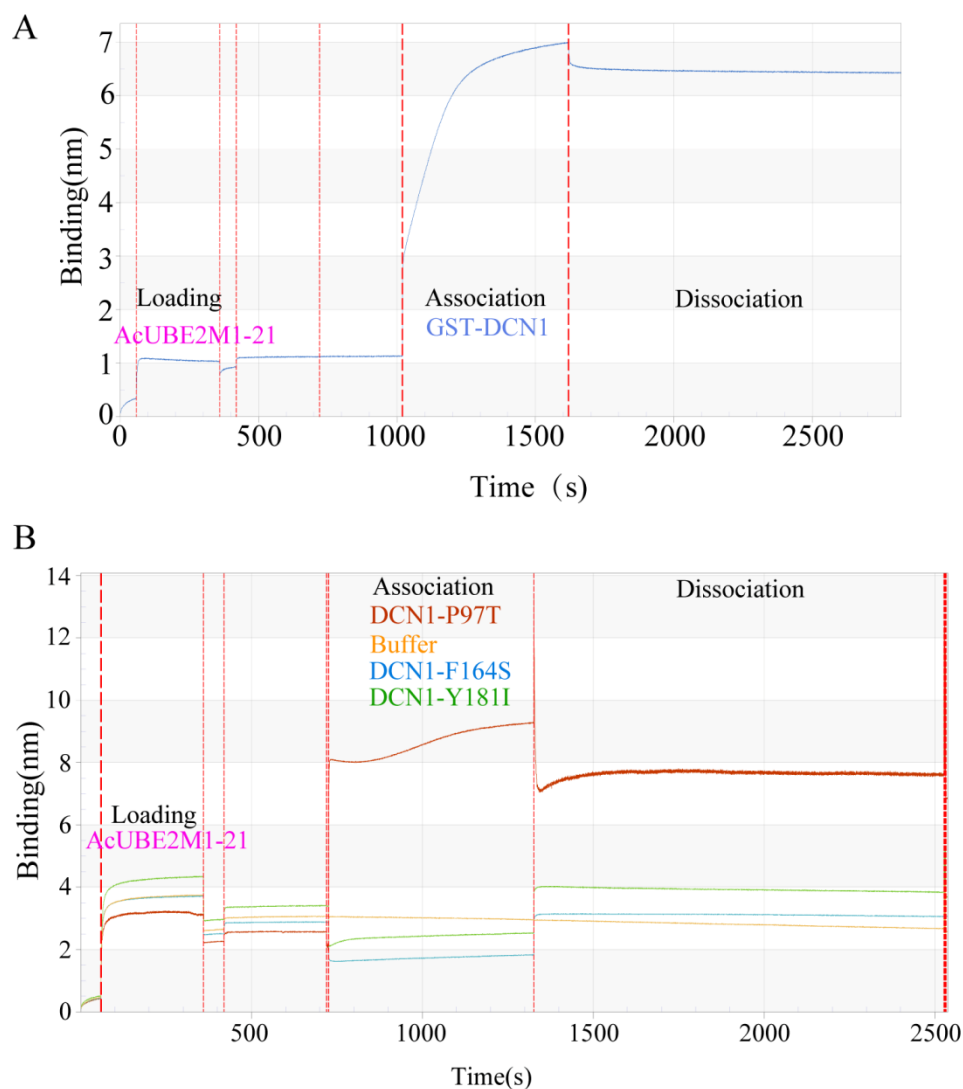

**Figure S3. The direct interaction of Biotin-AcUBE2M<sup>1-21</sup> peptides with wild type DCN1(GST-DCN1)(A) and its mutants(P97T, F164S and Y181I)(B).** After loading Biotin-AcUBE2M<sup>1-21</sup> peptides on Super Streptavidin (SSA) sensor, wild type DCN1(GST-DCN1)(A) and its mutants(P97T, F164S and Y181I) were added into the system, respectively. The signals were detected by Octet RED 96.

**HPLC spectra of representative compounds.**

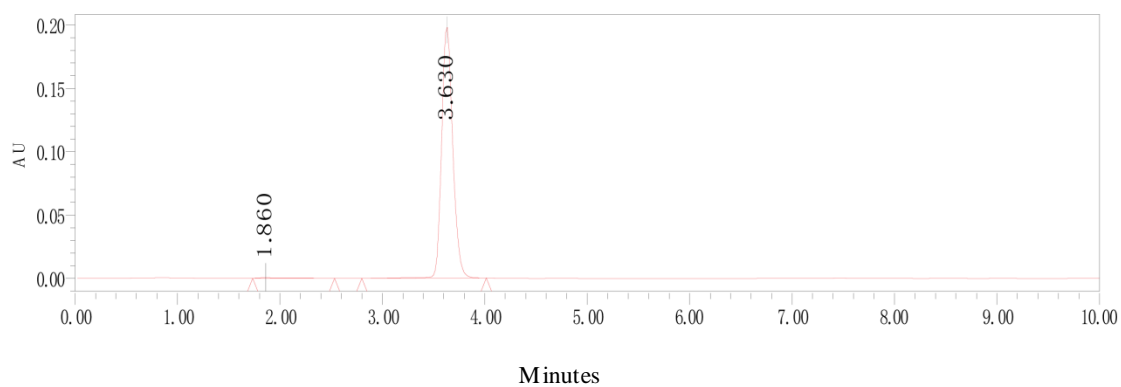

| Peak | Retention Time | Area    | % Area |
|------|----------------|---------|--------|
| 1    | 1.86           | 4826    | 0.32   |
| 2    | 3.63           | 1489685 | 99.68  |

### HPLC chromatogram of compound DC-2N

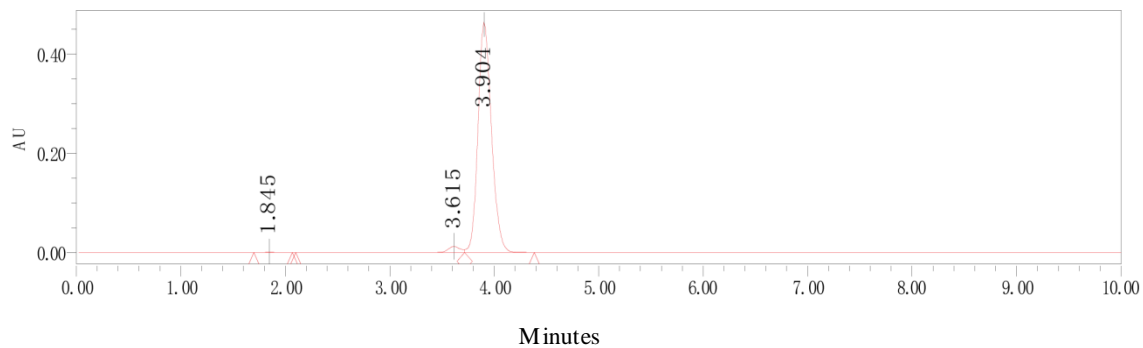

| Peak | Retention Time | Area    | % Area |
|------|----------------|---------|--------|
| 1    | 1.85           | 2995    | 0.07   |
| 2    | 3.62           | 103881  | 2.44   |
| 3    | 3.90           | 4155191 | 97.49  |

### HPLC chromatogram of compound 39

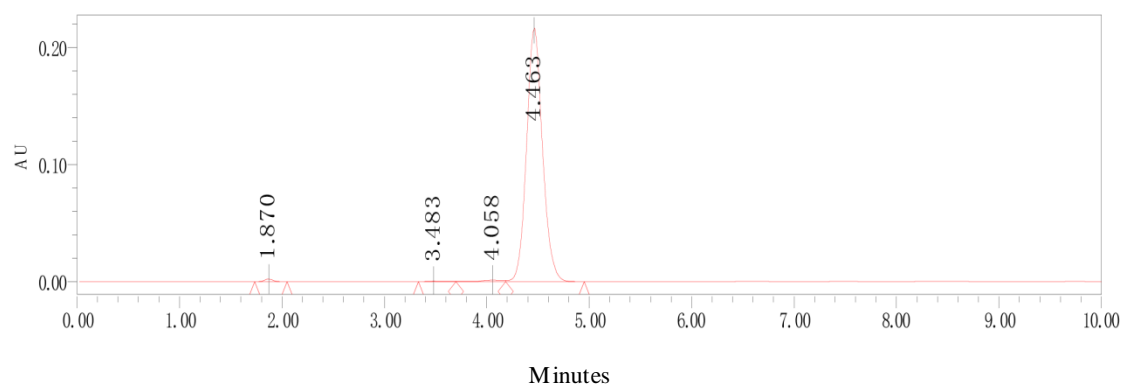

| Peak | Retention Time | Area    | % Area |
|------|----------------|---------|--------|
| 1    | 1.87           | 12311   | 0.52   |
| 2    | 3.48           | 4238    | 0.18   |
| 3    | 4.06           | 19441   | 0.82   |
| 4    | 4.46           | 2348664 | 98.49  |

**HPLC chromatogram of compound DC-2**
